# Supplementary material for: Large-scale production of megakaryocytes from human pluripotent stem cells by chemically defined forward programming
Source: PubMed Central journal article supplement (PMC4829662; doi:10.1038/ncomms11208), 2016-04-07
Supplement: ncomms11208-s1.pdf [file ncomms11208-s1.pdf]

**a**

| CB-MK vs. hESC comparative analysis |                |          |              |                |                 |
|-------------------------------------|----------------|----------|--------------|----------------|-----------------|
| Expression RANK                     | Entrez Gene ID | Symbol   | log2(MK-ESC) | Internal Nodes | Chromatin nodes |
| 1                                   | 2313           | FLI1     | 6.218082146  | 2              | 0               |
| 2                                   | 4176           | MCM7     | 5.986352868  | 1              | 1               |
| 3                                   | 2623           | GATA1    | 4.962946076  | 6              | 5               |
| 4                                   | 4208           | MEF2C    | 4.900404526  | 1              | 6               |
| 5                                   | 8328           | GF11B    | 4.495031127  | 0              | 0               |
| 6                                   | 6886           | TAL1     | 3.985331451  | 1              | 3               |
| 7                                   | 861            | RUNX1    | 3.902        | 0              | 5               |
| 8                                   | 29883          | CNOT7    | 3.694630861  | 0              | 0               |
| 9                                   | 10538          | BATF     | 2.981322104  | 0              | 0               |
| 10                                  | 10320          | IKZF1    | 2.924327784  | 2              | 6               |
| 11                                  | 54816          | ZNF280D  | 2.904703907  | 0              | 0               |
| 12                                  | 7704           | ZBTB16   | 2.842398404  | 1              | 9               |
| 13                                  | 6915           | TBXA2R   | 2.807151272  | 0              | 0               |
| 14                                  | 6688           | SPI1     | 2.545218071  | 2              | 5               |
| 15                                  | 56978          | PRDM8    | 2.421821704  | 0              | 0               |
| 16                                  | 2122           | MECOM    | 2.413061623  | 0              | 3               |
| 17                                  | 10661          | KLF1     | 2.377123936  | 1              | 1               |
| 18                                  | 25946          | ZNF385   | 2.35559522   | 0              | 1               |
| 19                                  | 4149           | MAX      | 2.232674581  | 0              | 2               |
| 20                                  | 79230          | ZNF557   | 2.227154539  | 0              | 0               |
| 21                                  | 864            | RUNX3    | 2.142642552  | 0              | 6               |
| 22                                  | 10194          | TSHZ1    | 2.112852011  | 0              | 0               |
| 23                                  | 168544         | ZNF467   | 2.087691342  | 1              | 0               |
| 24                                  | 51157          | ZNF580   | 2.049279855  | 0              | 0               |
| 25                                  | 51341          | ZBTB7A   | 2.040210037  | 0              | 4               |
| 26                                  | 90594          | ZNF439   | 2.031431266  | 0              | 0               |
| 27                                  | 3202           | HOXA5    | 1.919975036  | 3              | 1               |
| 28                                  | 23414          | ZFPM2    | 1.907889051  | 1              | 1               |
| 29                                  | 7128           | TNFAIP3  | 1.852543925  | 0              | 0               |
| 30                                  | 79192          | IRX1     | 1.832799737  | 0              | 0               |
| 31                                  | 4772           | NFATC1   | 1.806170804  | 1              | 2               |
| 32                                  | 6775           | STAT4    | 1.741736537  | 1              | 1               |
| 33                                  | 5970           | RELA     | 1.71499009   | 1              | 10              |
| 34                                  | 146542         | ZNF688   | 1.642303935  | 0              | 0               |
| 35                                  | 7507           | XPA      | 1.556867603  | 0              | 1               |
| 36                                  | 3229           | HOXC13   | 1.546458879  | 0              | 0               |
| 37                                  | 4782           | NFIC     | 1.529451132  | 0              | 1               |
| 38                                  | 121274         | ZNF641   | 1.507346451  | 0              | 0               |
| 39                                  | 79175          | ZNF343   | 1.479242387  | 0              | 0               |
| 40                                  | 55897          | MESP1    | 1.464070356  | 0              | 0               |
| 41                                  | 3212           | HOXB2    | 1.343797629  | 0              | 2               |
| 42                                  | 22806          | ZNFN1A3  | 1.329858707  | 1              | 4               |
| 43                                  | 4097           | MAFG     | 1.292335842  | 0              | 1               |
| 44                                  | 6304           | SATB1    | 1.264860686  | 0              | 3               |
| 45                                  | 2306           | FOXO2    | 1.228418006  | 0              | 0               |
| 46                                  | 6915           | TBXA2R   | 1.200562225  | 0              | 0               |
| 47                                  | 7490           | WT1      | 1.185142601  | 0              | 1               |
| 48                                  | 58508          | MLL3     | 1.169828436  | 2              | 0               |
| 49                                  | 5325           | PLAGL1   | 1.164040819  | 0              | 3               |
| 50                                  | 2355           | FOSL2    | 1.10592127   | 0              | 0               |
| 51                                  | 25913          | POT1     | 1.096700285  | 0              | 0               |
| 52                                  | 6945           | MLX      | 1.078171011  | 0              | 0               |
| 53                                  | 163059         | ZNF433   | 1.07087317   | 0              | 0               |
| 54                                  | 54921          | DERPC    | 1.0671444    | 0              | 0               |
| 55                                  | 1388           | CREBL1   | 1.056454596  | 0              | 0               |
| 56                                  | 4297           | MLL      | 1.052634651  | 2              | 3               |
| 57                                  | 3297           | HSF1     | 1.050663495  | 0              | 4               |
| 58                                  | 79027          | ZNF655   | 1.036140954  | 0              | 0               |
| 59                                  | 54617          | INOC1    | 1.028943464  | 0              | 0               |
| 60                                  | 92822          | ZNF276   | 1.025727446  | 0              | 0               |
| 61                                  | 79724          | FLJ23436 | 0.954750193  | 0              | 0               |
| 62                                  | 1389           | CREBL2   | 0.930665715  | 0              | 0               |
| 63                                  | 1745           | DLX1     | 0.907017189  | 0              | 0               |
| 64                                  | 50804          | MYEF2    | 0.898223319  | 0              | 0               |
| 65                                  | 9575           | CLOCK    | 0.892683013  | 0              | 2               |
| 66                                  | 5252           | PHF1     | 0.873134407  | 5              | 0               |
| 67                                  | 9191           | DEDD     | 0.854743494  | 0              | 0               |
| 68                                  | 54862          | CC2D1A   | 0.84994884   | 0              | 0               |
| 69                                  | 10847          | SRCAP    | 0.823139145  | 0              | 2               |
| 70                                  | 7290           | HIRA     | 0.80510379   | 2              | -               |
| 71                                  | 267004         | PGBD3    | 0.778657087  | 0              | 0               |
| 72                                  | 163087         | ZNF383   | 0.75853371   | 0              | 0               |
| 73                                  | 4205           | MEF2A    | 0.742000993  | 1              | 5               |
| 74                                  | 3203           | HOXA6    | 0.720932756  | 0              | 0               |
| 75                                  | 221785         | ZNF498   | 0.719656867  | 0              | 0               |
| 76                                  | 388569         | FLJ45850 | 0.716863475  | 0              | 0               |
| 77                                  | 122953         | JDP2     | 0.69730326   | 0              | 2               |
| 78                                  | 7629           | ZNF76    | 0.681751808  | 0              | 2               |
| 79                                  | 7067           | THRA     | 0.670073694  | 1              | 5               |
| 80                                  | 3508           | IGHMBP2  | 0.634230623  | 0              | 0               |
| 81                                  | 2145           | EZH1     | 0.627585534  | 0              | 0               |
| 82                                  | 7067           | THRA     | 0.626375578  | 0              | 4               |
| 83                                  | 64763          | ZNF574   | 0.534902684  | 0              | 0               |
| 84                                  | 64412          | ZNF336   | 0.508063874  | 0              | 0               |
| 85                                  | 339559         | ZNF642   | 0.489980158  | 0              | 0               |
| 86                                  | 4221           | MEN1     | 0.488010277  | 2              | 2               |
| 87                                  | 57684          | ZBTB26   | 0.486487546  | 0              | 0               |
| 88                                  | 4798           | NFRKB    | 0.482938158  | 0              | 0               |
| 89                                  | 27343          | POLL     | 0.477708994  | 0              | 0               |
| 90                                  | 54885          | FLJ20298 | 0.469046252  | 0              | 0               |
| 91                                  | 3642           | INSM1    | 0.461211931  | 0              | 2               |
| 92                                  | 79973          | ZNF442   | 0.379657793  | 0              | 0               |
| 93                                  | 84330          | ZNF414   | 0.367386704  | 0              | 0               |
| 94                                  | 7727           | ZNF174   | 0.265735517  | 0              | 0               |
| 95                                  | 54993          | ZSCAN2   | 0.078694232  | 0              | 0               |
| -                                   | 4211           | MEIS1    | -            | 3              | 1               |
| -                                   | 5087           | PBX1     | -            | 2              | 0               |
| -                                   | 1831           | TSC2D3   | -            | 1              | 2               |
| -                                   | 4778           | NFE2     | -            | 1              | 1               |
| -                                   | 161882         | ZFPM1    | -            | 1              | 0               |
| -                                   | 55544          | RBM38    | -            | 0              | 0               |

**101 DNA binding protein candidates**

Removal of 21 histone genes from 116 MK specific identified DNA binding genes  
 Addition of MEIS1, NFE2, PBX1, ZFPM1, RBM38, TSC2D3 to the list  
 (literature pick, blue highlight)

**b**

| Candidate ranking |         |              |                |                 |
|-------------------|---------|--------------|----------------|-----------------|
| Candidate RANK    | Symbol  | log2(MK-ESC) | Internal Nodes | Chromatin nodes |
| 1                 | GATA1   | 4.962946076  | 6              | 5               |
| 2                 | IKZF1   | 2.924327784  | 2              | 6               |
| 3                 | SPI1    | 2.545218071  | 2              | 5               |
| 4                 | HOXA5   | 1.919975036  | 2              | 1               |
| 5                 | MEIS1   | -            | 2              | 1               |
| 6                 | FLI1    | 6.218082146  | 2              | 0               |
| 7                 | PBX1    | -            | 2              | 0               |
| 8                 | ZBTB16  | 2.842398404  | 1              | 9               |
| 9                 | ZNFN1A3 | 1.329858707  | 1              | 4               |
| 10                | TAL1    | 3.985331451  | 1              | 3               |
| 11                | NFATC1  | 1.806170804  | 1              | 2               |
| 12                | TSC2D3  | -            | 1              | 2               |
| 13                | KLF1    | 2.377123936  | 1              | 1               |
| 14                | ZFPM2   | 1.907889051  | 1              | 1               |
| 15                | STAT4   | 1.741736537  | 1              | 1               |
| 16                | NFE2    | -            | 1              | 1               |
| 17                | ZNF467  | 2.087691342  | 1              | 0               |
| 18                | ZFPM1   | -            | 1              | 0               |
| 19                | RELA    | 1.71499009   | 0              | 10              |
| 20                | MEF2C   | 4.900404526  | 0              | 6               |
| 21                | RUNX3   | 2.142642552  | 0              | 6               |
| 22                | RUNX1   | 3.902        | 0              | 5               |
| 23                | ZBTB7A  | 2.040210037  | 0              | 4               |
| 24                | HSF1    | 1.050663495  | 0              | 4               |
| 25                | MECOM   | 2.413061623  | 0              | 3               |
| 26                | SATB1   | 1.264860686  | 0              | 3               |
| 27                | PLAGL1  | 1.164040819  | 0              | 3               |
| 28                | MAX     | 2.232674581  | 0              | 2               |
| 29                | HOXB2   | 1.343797629  | 0              | 2               |
| 30                | CLOCK   | 0.892683013  | 0              | 2               |
| 31                | ZNF385  | 2.35559522   | 0              | 1               |
| 32                | XPA     | 1.556867603  | 0              | 1               |
| 33                | NFIC    | 1.529451132  | 0              | 1               |
| 34                | MAFG    | 1.292335842  | 0              | 1               |
| 35                | WT1     | 1.185142601  | 0              | 1               |
| 36                | GF11B   | 4.495031127  | 0              | 0               |
| 37                | CNOT7   | 3.694630861  | 0              | 0               |
| 38                | BATF    | 2.981322104  | 0              | 0               |
| 39                | ZNF280D | 2.904703907  | 0              | 0               |
| 40                | TBXA2R  | 2.807151272  | 0              | 0               |
| 41                | PRDM8   | 2.421821704  | 0              | 0               |
| 42                | ZNF557  | 2.227154539  | 0              | 0               |
| 43                | TSHZ1   | 2.112852011  | 0              | 0               |
| 44                | ZNF580  | 2.049279855  | 0              | 0               |
| 45                | ZNF439  | 2.031431266  | 0              | 0               |
| 46                | RBM38   | -            | 0              | 0               |

**46 Transcription Factor candidates**

Analysis of documented protein-protein interactions (VisANT)

Sorting on:

1. number of internal interactions
2. number of interactions with chromatin remodelling factors
3. differential gene expression
4. exclusion of low DE genes ( $\log_2 < 1$ )
5. exclusion of zero nodes low DE genes ( $\log_2 < 2$ )
6. Atypic exclusion of MLL, MLL3 (technical, cloning in lentiviruses not possible); MCM7 (mini chromosome maintenance)
7. Atypic inclusion of CLOCK (HAC activity)

**c**

| Gene list for epigenome modifiers |        |        |
|-----------------------------------|--------|--------|
| HDAC                              | HAC    | DNMT   |
| HDAC1                             | CREBBP | DNMT1  |
| HDAC2                             | CDY1   | DNMT3A |
| HDAC3                             | CDY2   | DNMT3B |
| HDAC4                             | CDYL1  |        |
| HDAC5                             | CLOCK  |        |
| HDAC6                             | ELP3   |        |
| HDAC7A                            | EP300  |        |
| HDAC8                             | HAT1   |        |
| HDAC9                             | KAT2A  |        |
| HDAC10                            | KAT2B  |        |
| HDAC11                            | KAT5   |        |
| SIRT1                             | MYST1  |        |
| SIRT2                             | MYST2  |        |
| SIRT3                             | MYST3  |        |
| SIRT4                             | MYST4  |        |
| SIRT5                             | NCOA1  |        |
| SIRT6                             | NCOA3  |        |
| SIRT7                             | NCOAT  |        |
|                                   | TF3C4  |        |

Chromatin remodelling factors and DNA methyl transferases used for the chromatin remodelling factor interaction analysis

**Supplementary Figure 1. Selection process for MK-FOP transcription factor candidates. (a)** List of the 101 DNA protein binding genes up-regulated in cbMKs vs. the H9 hESC line (see *online materials* for details). Twenty one

histone coding genes have been excluded and 6 additional TFs added based on literature (highlighted in blue). Log2 values of differential expression, number of internal/epigenome modifier interactions (reported from VisANT) are indicated **(b)** Final 46 TF candidates ranked list. The 9 TFs used in this study are highlighted in grey. **(c)** Epigenome modifier coding genes used for interaction screening. HDAC: Histone Deacetylases; HAC: Histone acetyltransferases; DNMT: DNA Methyltransferases.

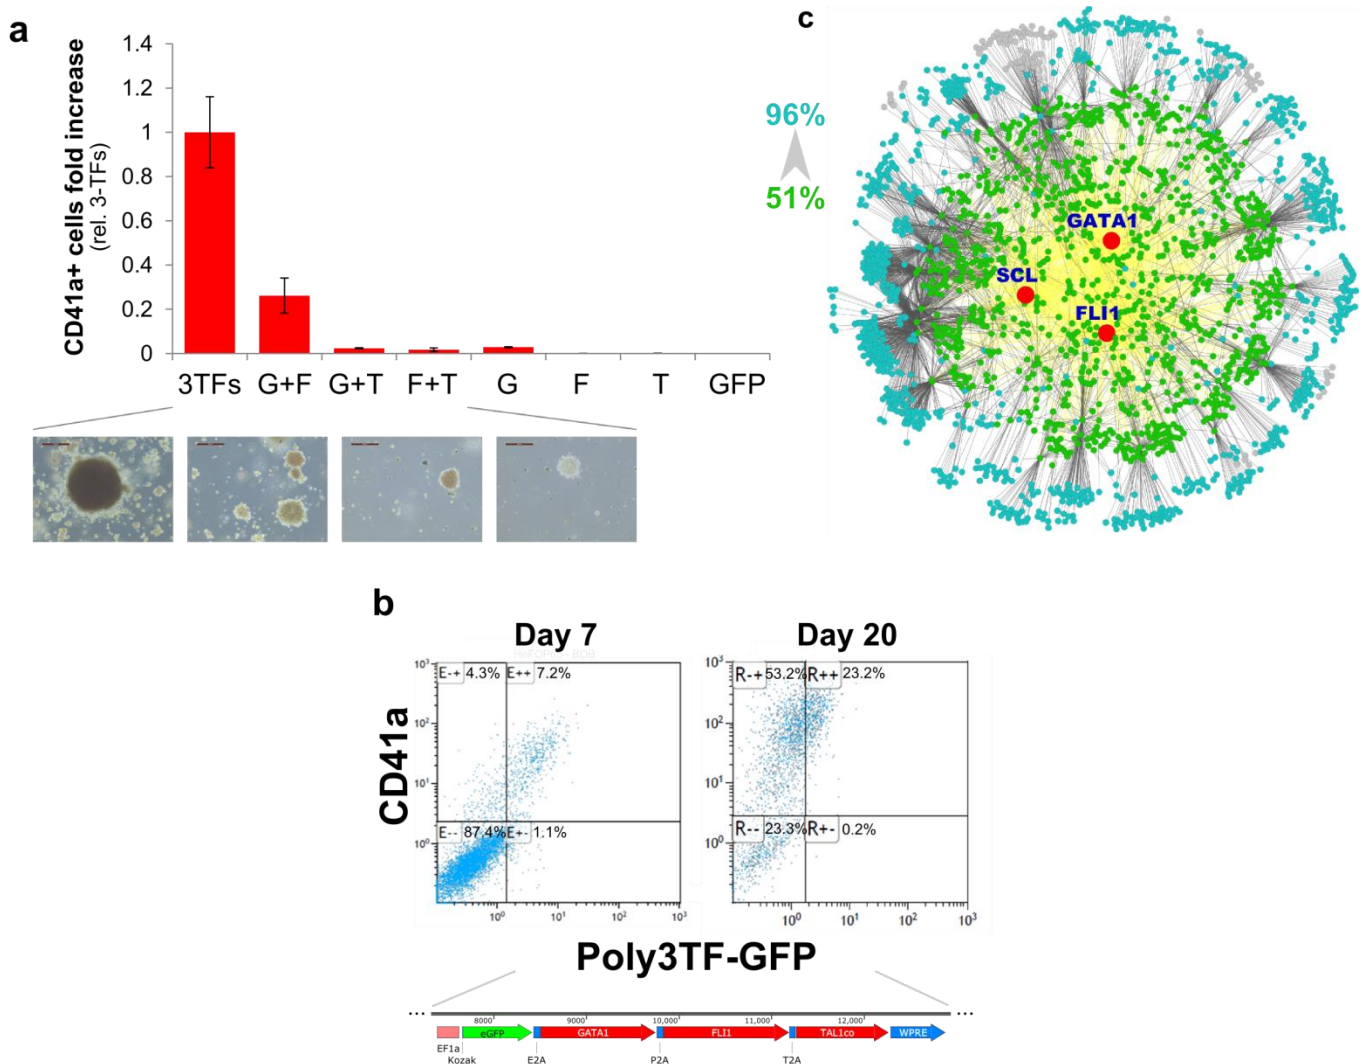

**Supplementary Figure 2. Combined expression of the 3-TFs induces MKFOP.** **(a)** Representative microscopy fields from clonogenic assays initiated from day 7 cultures transduced with different combinations of the 3-TFs (hiPSC#1; 3-TFs, G+F, G+T, F+T respectively) showing higher colony density and larger colonies for the combined 3TFs than any other combination. **(b)** Combined CD41a and GFP expression detected by flow cytometry from day 7 and day 20 cells transduced with a single polycistronic vector coding for the 3-TFs and the GFP reporter gene (2A peptide vector; hiPSC#1). **(c)** Annotated Cytoscape MK gene network (Gieger et al., 2011; 2,125 nodes) showing intersection with 3-TFs ChIP-seq data (Tijssen et al., 2011). The regulatory regions of 51% of the MK genes are bound by at least one of the 3-TFs (green nodes) which are further linked to 96% of the entire network through first degree interactions (blue nodes).

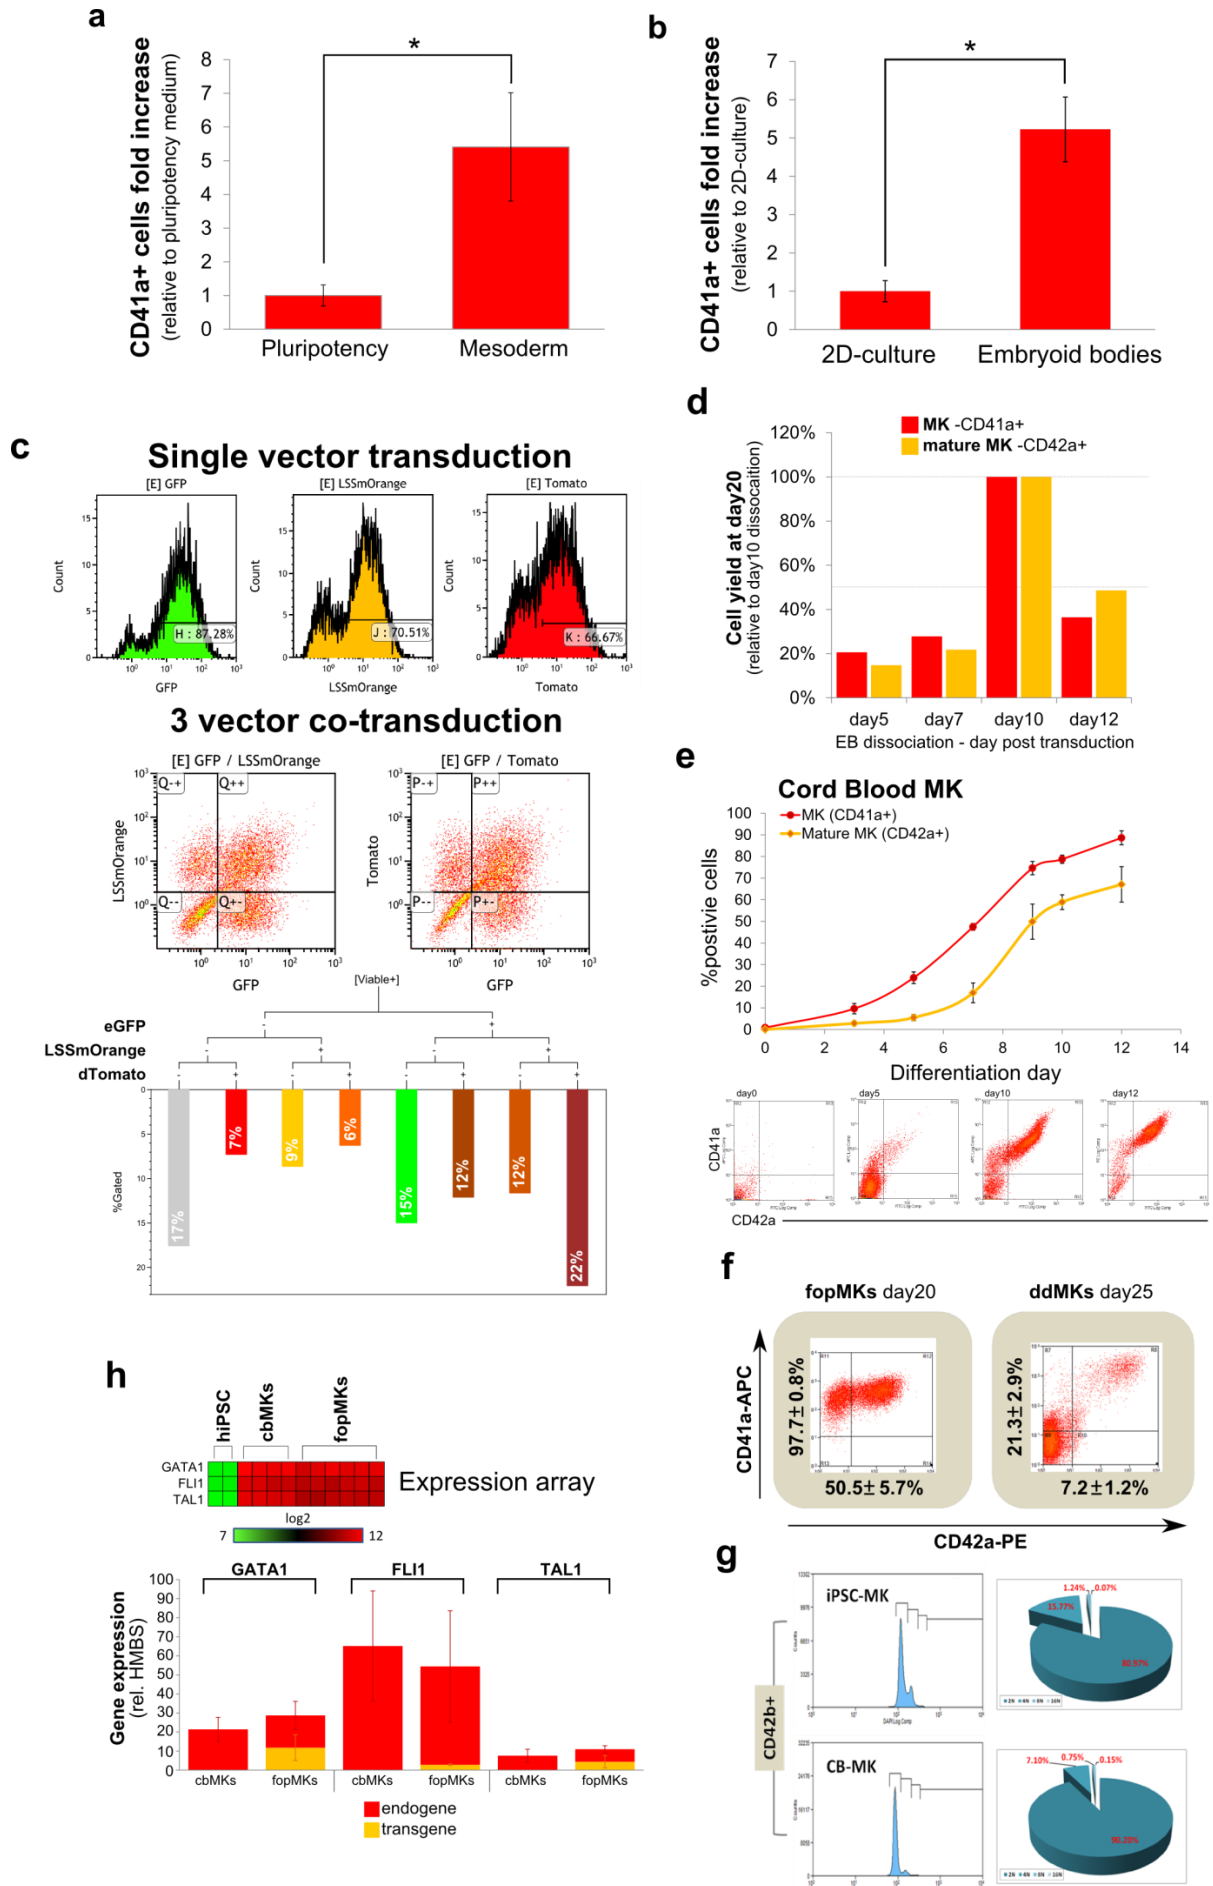

**Supplementary Figure 3. Optimisation of a chemically-defined MKFOP protocol.** (a) The hiPSC#1-2 lines shown as clumps on fibronectin-coated plates were transduced by the 3-TFs and maintained in pluripotency (FGF2+activinA) or mesoderm-inducing (FGF2+BMP4+LY-294002) medium for 2 days followed by MK medium (TPO+SCF) for a further

5 days. The percentage of CD41a+ cells was measured by flow cytometry on day 7. Bar graphs show the fold increase of CD41a+ cells relative to pluripotency medium (mean  $\pm$ sem; n=4, \* $P$ <0.05 by 2-tail T-test). **(b)** The hiPSC#2 line was sown as clumps or single cells on fibronectin- or gelatine-coated plates (collectively 2-D culture), or sown as embryoid bodies induced by forced aggregation of single cells (Embryoid bodies, EB) concomitantly to transduction with the 3-TFs. Cells were then maintained for 2 days in mesoderm-inducing medium followed by 5 days in MK medium. Bar graphs represent the CD41a+ cell-fold increase relative to 2D-culture (mean  $\pm$ sem, n=4, 3 respectively, \* $P$ <0.05 by 2-tail T-test). **(c)** the hiPSC#1 was transduced with separate pWPT lentiviral vectors coding for the reporter proteins eGFP, dTomato or LSSmOrange. The percentages of cells (co-)expressing each reporter after transduction at MOI20 by single vectors (top histograms) or co-transduction with three vectors (middle dot plots and bottom bar graph) are indicated. **(d)** The impact of EB dissociation timing on day 20 FOPMKs output was tested from day 5 to 12. The MK and mature MK yield (cell count at day 20) is shown relative to day 10 dissociation (hiPSC#1). **(e)** Time course analysis of cbMK differentiation including line plots and representative flow cytometry dot plots for CD41a and CD42a expression (mean  $\pm$ sem; n=3). **(f)** Representative flow cytometry dot plots from MK-FOP culture at day 20 and MK-DD at day 25 (mean  $\pm$ sem; n=4, 3 respectively, hiPSC#1). **(g)** Ploidy analysis of CD42b+ fopMKs day 20 and cbMKs day 10 by flow cytometry. Representative histograms and percentages of 2, 4, 8 and 16N cells are shown (mean; n=3 and 2 respectively). **(h)** The expression levels of the 3-TFs in cbMKs (day10) and fopMKs (day20) are shown from the whole genome expression array data (top row normalized heatmap) and from RT-qPCR analysis (bottom bar graph; mean  $\pm$ sem; n=3/3 for cbMKs and fopMKs (hiPSC#1, #3 and #4) respectively). The latter discriminates endogenous from transgenic expression using specific primers described in Methods and Supplementary Table2.

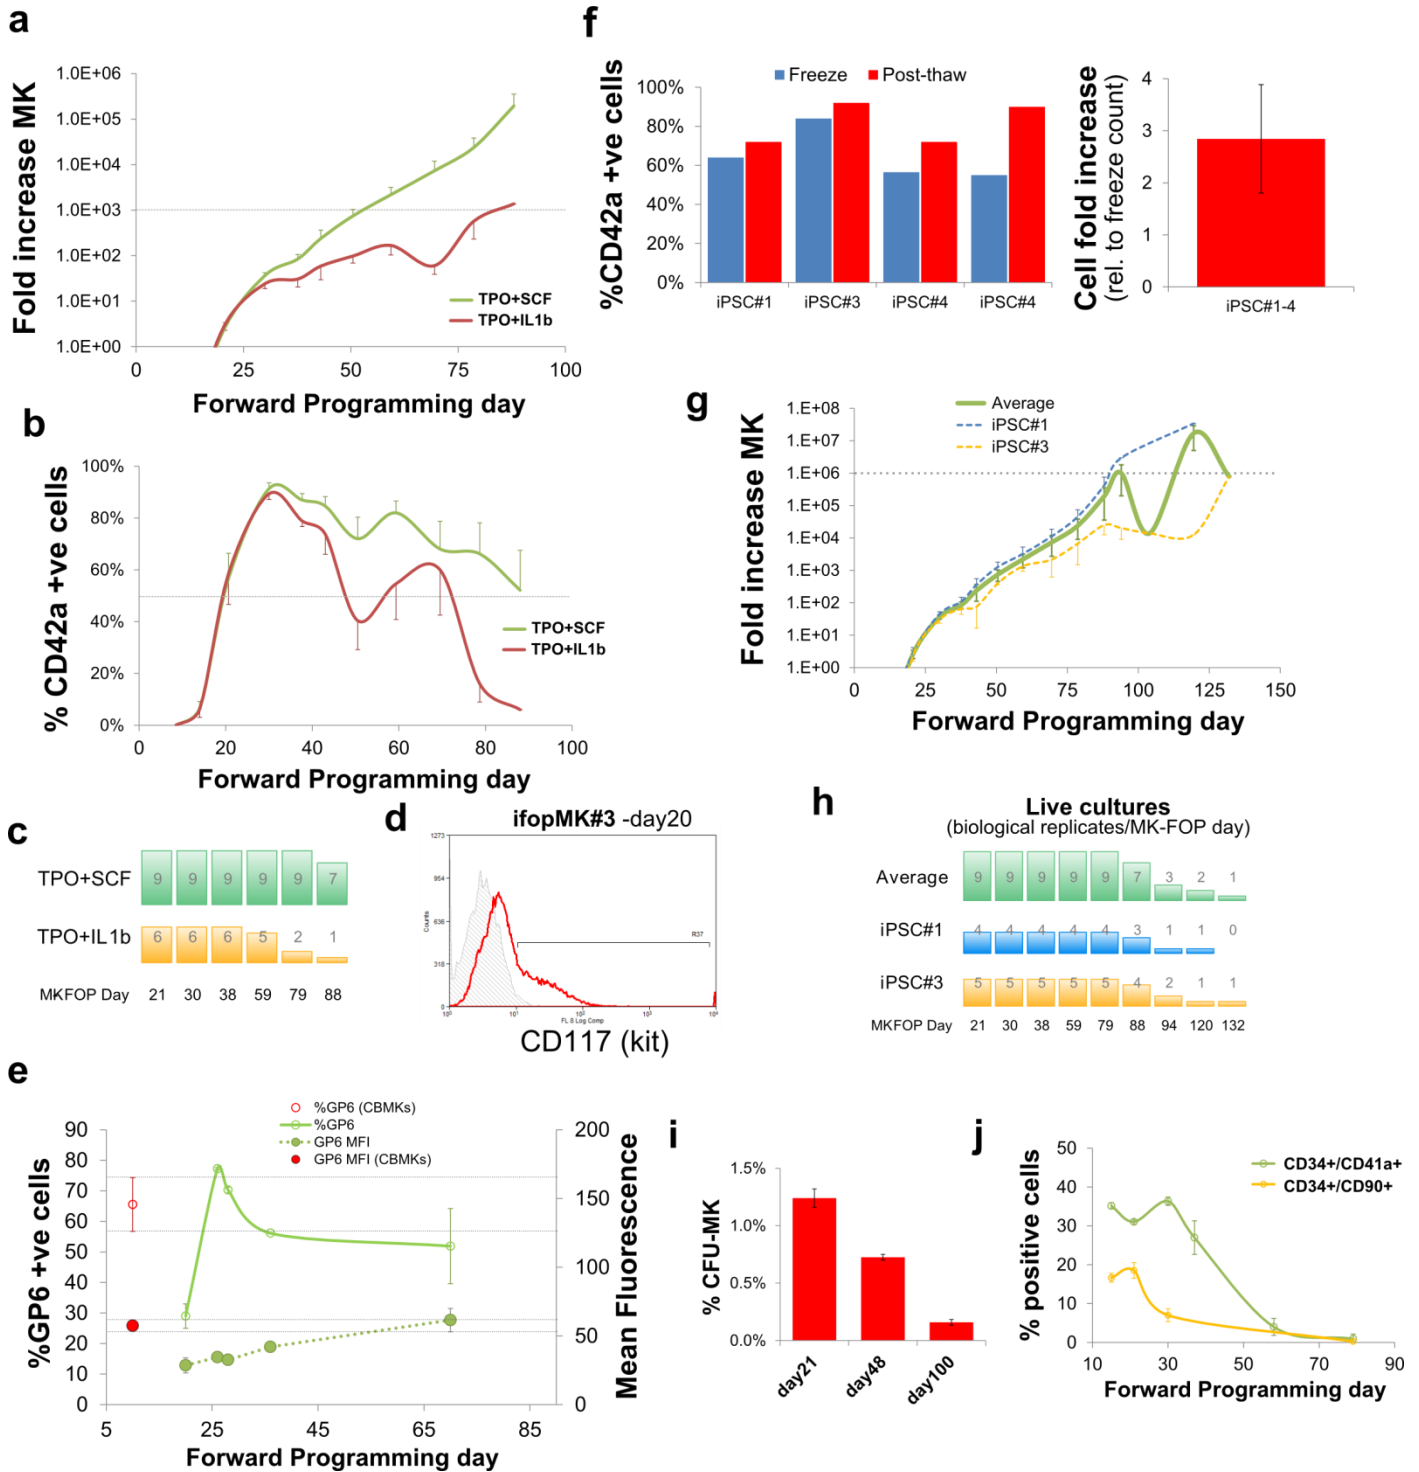

**Supplementary Figure 4. Long-term MKFOP culture properties.** (a-c) The cumulative mature MK-fold increase relative to day 0 hiPSC cell input, percentages of CD42a+ cells and culture survival (biological replicate alive at a given time point) are shown for TPO+SCF vs. TPO+IL1 $\beta$  culture conditions (mean  $\pm$ sem, hiPSC lines #1 and #3). (d) Expression of CD117 (KIT, SCF receptor) in MK-FOP culture. (e) The percentage of GP6 expressing cells and GP6 staining mean fluorescence intensity are shown over time for LT-fopMK culture (mean  $\pm$ sd, hiPSC lines #1 and #3, n=2) and CBMKs at day 10 (mean $\pm$ sem, n=7). (f) LT-fopMK recovery after freezing. The percentages of CD42a+ cells on the day of freezing (day 30-40 of MK-FOP) and 14 days after thawing are shown for different iPSC lines. The mean  $\pm$ sem cell fold increase 14 days after thawing is shown for the corresponding lines. (g-h) Cumulative MK expansion and biological replicate survival at extended time points (>day 90). (i) Clonogenic potential from whole MK-FOP cultures was tested at different time points. The percentage of MK colony forming cells is shown (mean  $\pm$ sd; hiPSC#1, n=2). (j) Percentages of MK progenitors (CD41a+ and CD34+) and hematopoietic progenitors (CD90+ and CD34+) were monitored by flow cytometry through long term MK-FOP cultures (mean  $\pm$ sd; hiPSC#1 and #3, n=3).

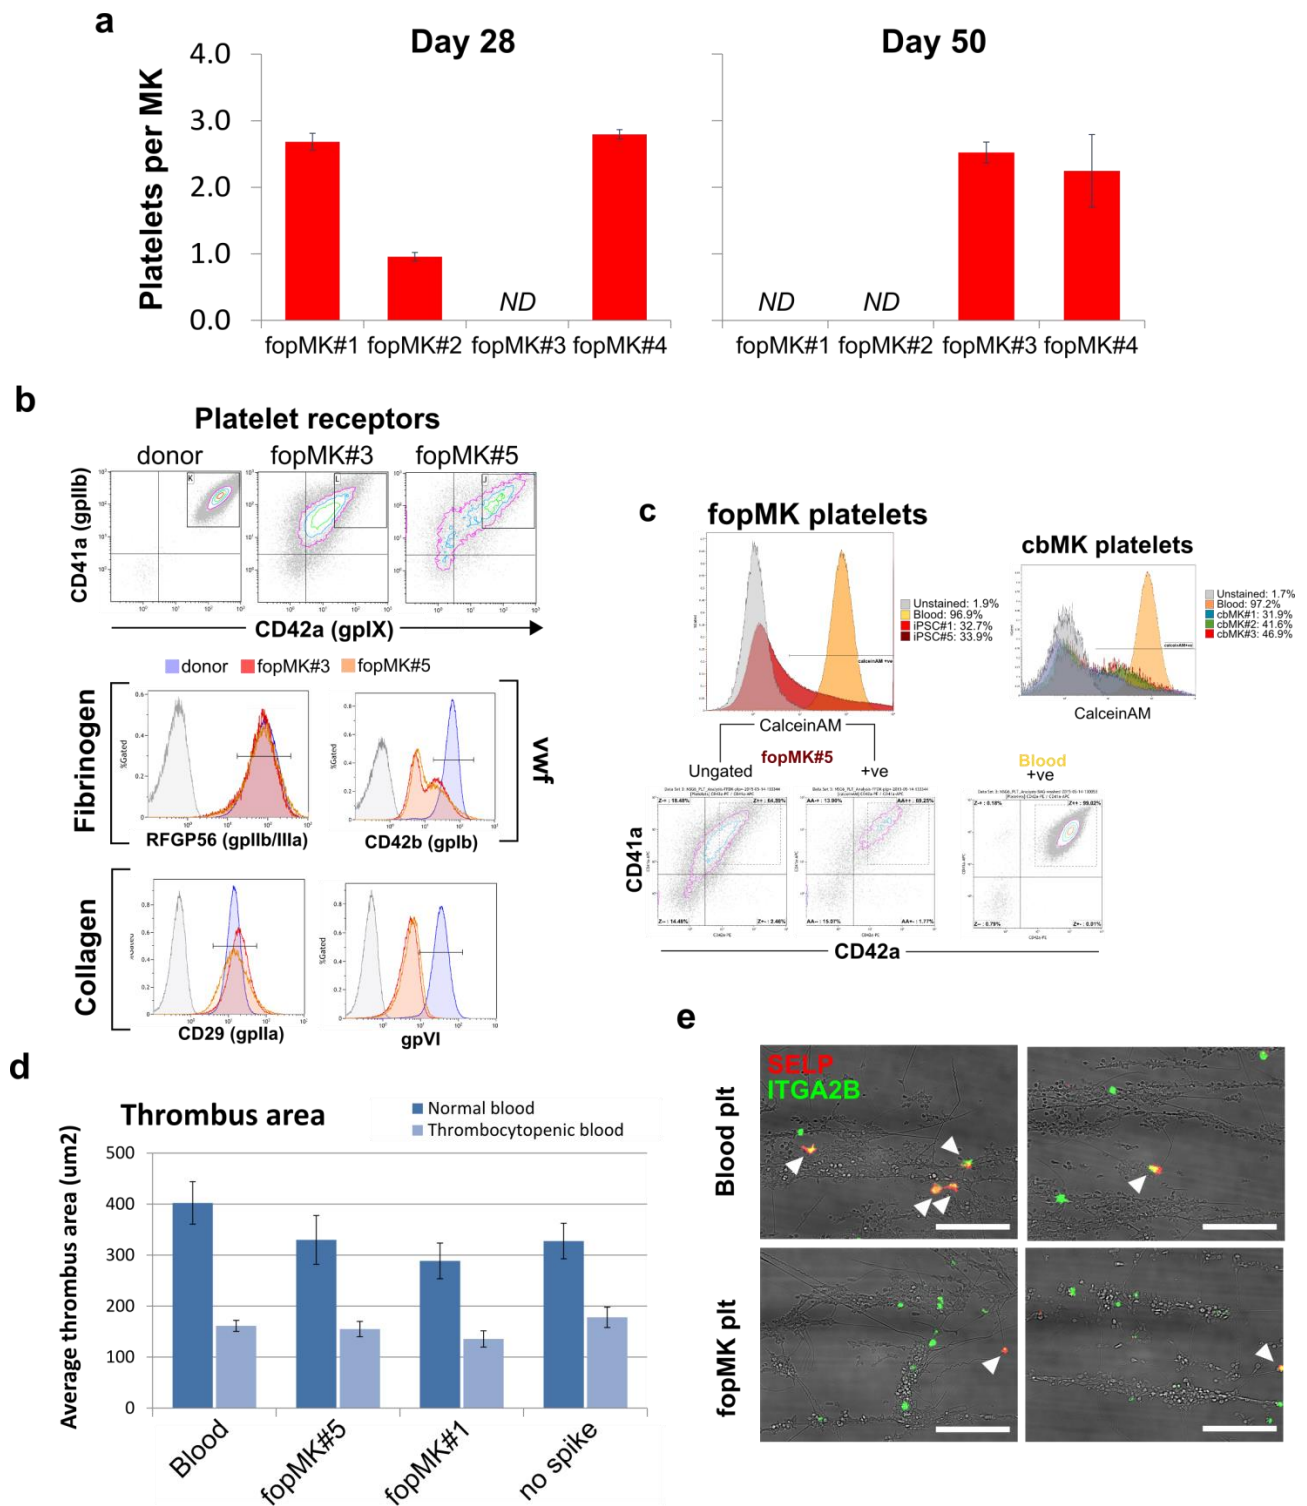

**Supplementary Figure 5. *In vitro* platelet release from fopMKs.** (a) Average platelet generation per MK in co-culture with C3H10T1/2 feeder cells at different culture time points depending on the hiPSC line forward programmed (mean  $\pm$ sd; hiPSC#1-4; day 28: n=6, 2, nd, 3; day 50: n=nd, nd, 4, 2 respectively, nd=not done). (b) Expression of platelet receptors on washed donor and *in vitro* fopMK platelets. Primary staining for CD41a and CD42a expression (top dot plots) was used for gating on highly expressing platelets similar to blood platelets (black box) for further platelet receptor expression analysis (bottom histograms). (c) Representative staining by Calcein-AM of *in vitro* fopMK and donor platelets. The corresponding CD41a/CD42a phenotype detected by flow cytometry with or without gating on Calcein-AM positive events is shown below. (d) Average  $\pm$ sem of individual thrombus area from *in vitro* thrombus assay under shear stress for normal and thrombocytopenic blood. (e) Representative pictures from *in vitro* thrombus formation assays. Washed platelets from human blood or fopMKs were mixed into mouse blood ( $5 \times 10^7$ /ml) and thrombus formation on collagen-coated slides under arterial shear flow monitored by real time microscopy. Human platelets were subsequently detected by immunostaining of human CD41a (ITGA2B) and P-selectin (SELP). Arrowheads point to activated platelets exposing P-selectin at their surface following degranulation. Scale bars 50 $\mu$ m.

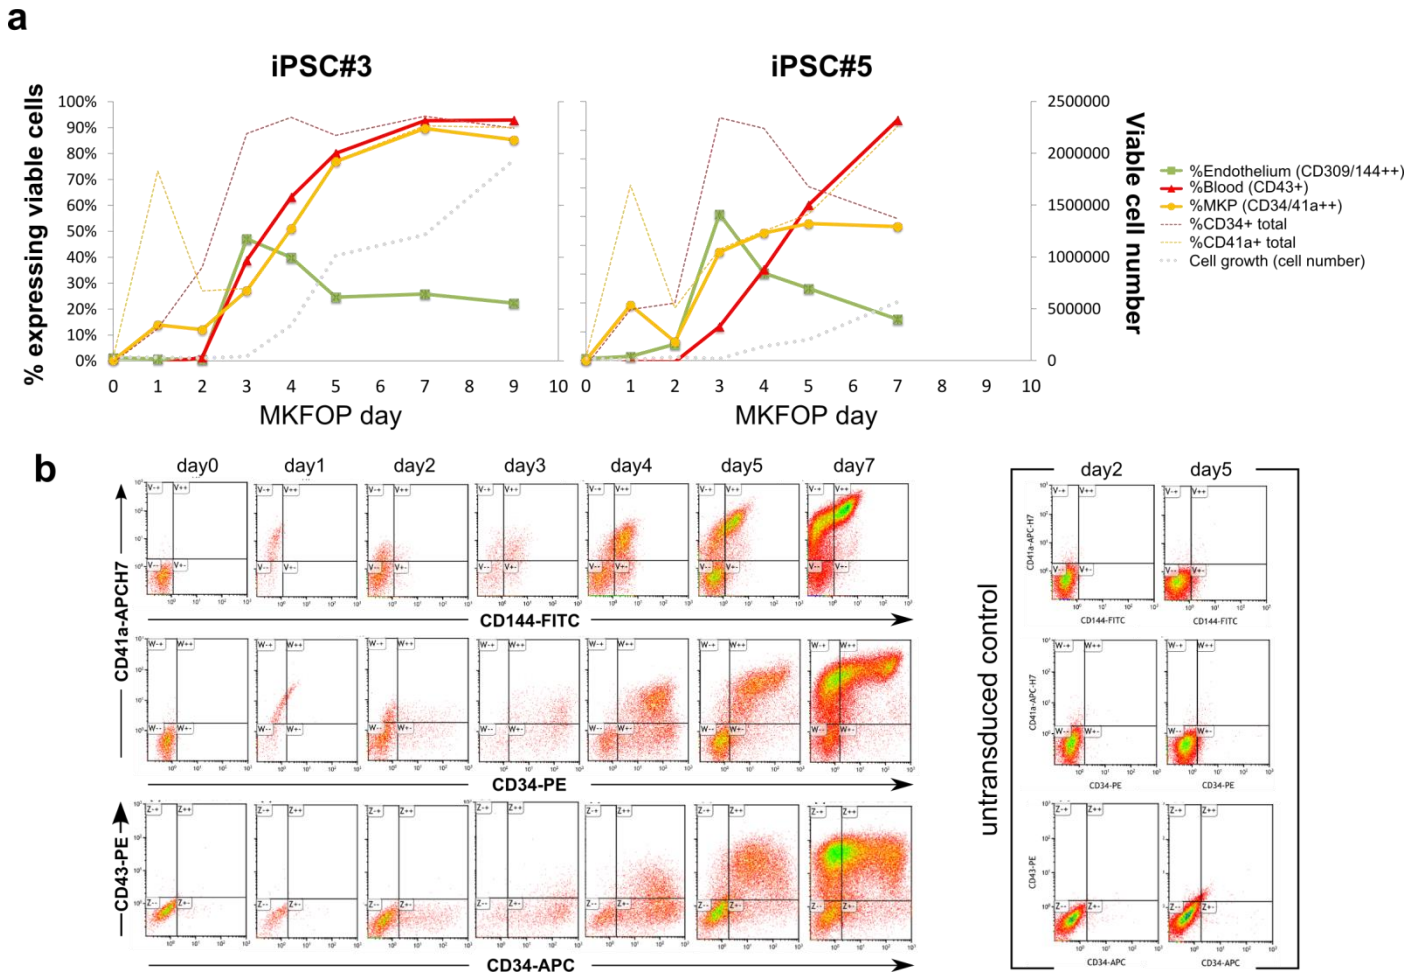

**Supplementary Figure 6. MK-FOP time course flow cytometry analysis for hemogenic endothelium and blood markers.** (a) the percentage of cells expressing endothelial (CD34, CD144/VE-Cadherin, CD309/FLK1) and blood markers (CD43, CD41a) are shown for hiPSC#3 and #5 from day 0 to day 7-9 post 3-TF transduction. The total viable cell count is indicated as a grey dotted line plotted on the secondary axis. (b) Flow cytometry dot plots from hiPSC#5 MK-FOP time course are shown, including phenotype of non-transduced control cells at day 2 and 5.

**Supplementary Table 1.** Antibodies used for flow cytometry analyses and immunostaining for microscopy studies.

| Antigen          | Antibody         | Fluorochrome | Assay concentration    | Manufacturer       |
|------------------|------------------|--------------|------------------------|--------------------|
| CD41a            | HIP8             | FITC         | 1:10 dilution (stock)  | BD Pharmingen      |
| CD41a            | HIP8             | PE           | 1:10 dilution (stock)  | BD Pharmingen      |
| CD41a            | HIP8             | APC          | 1:10 dilution (stock)  | BD Pharmingen      |
| CD42a            | ALMA.16          | FITC         | 1:10 dilution (stock)  | BD Pharmingen      |
| CD42a            | ALMA.16          | PE           | 1:10 dilution (stock)  | BD Pharmingen      |
| CD42b            | HIP1             | PE           | 1:10 dilution (stock)  | BD Pharmingen      |
| CD61             | VI-PL2           | FITC         | 1:10 dilution (stock)  | BD Pharmingen      |
| GPVI             | HY101            | PE           | 2µg/ml                 | NHSBT Bristol      |
| CD41a/61 complex | RFGP56           | APC          | 2µg/ml                 | NHSBT Bristol      |
| CD31             | WM59             | APC          | 1µg/ml                 | eBiosciences       |
| CD31             | WM59             | V-450        | 1µg/ml                 | eBiosciences       |
| vWF              | Polyclonal       | -            | 10µg/ml                | Millipore          |
| Thrombospondin   | A6.1             | -            | 1µg/ml                 | Abcam              |
| Fibrinogen       | -                | Alexa-488    | 50µg/ml                | Molecular Probes   |
| P-selectin       | Thromb/6         | PE           | 2µg/ml                 | NHSBT Bristol      |
| P-selectin       | H-150            | -            | 2µg/ml                 | Santa cruz Biotech |
| α-Tubulin        | DM1A             | -            | 1:500 dilution (stock) | Sigma Aldrich      |
| F-actin          | (Phalloidin)     | Alexa-488    | 400nM                  | Sigma Aldrich      |
| mIgG(H+L)        | <i>secondary</i> | Alexa-488    | 2µg/ml                 | Molecular Probes   |
| mIgG(H+L)        | <i>secondary</i> | Alexa-568    | 2µg/ml                 | Molecular Probes   |
| rIgG(H+L)        | <i>secondary</i> | Alexa-568    | 2µg/ml                 | Molecular Probes   |
| CD41a (mouse)    | MWReg30          | FITC         | 30µg/ml                | BD Pharmingen      |



**Supplementary Table 2.** Oligonucleotides used for RT-qPCR analyses.

| Target gene      | Primer | Sequence                   |
|------------------|--------|----------------------------|
| <b>GATA1</b>     | Fo     | TTGCCACATCCCCAAGGCGG       |
|                  | Re     | GGGGGAGGGGCTCTGAGGTC       |
| <b>FLI1</b>      | Fo     | GGGCTCGGCTGCAGACTTGG       |
|                  | Re     | AGATGGGCTGCCGCTCCGTA       |
| <b>TAL1</b>      | Fo     | AGCAAAGACCCGGGTGTGCATC     |
|                  | Re     | CCTCTAGCTGGGGTCACTGCG      |
| <b>ZFPM1</b>     | Fo     | GCTCCCTGGAGATCCACATGCG     |
|                  | Re     | ACAGGCAGATCAGGCACACGA      |
| <b>NFE2</b>      | Fo     | GGTGACCCCTGATGTTGCCCTAG    |
|                  | Re     | GGTCCCGGAAAGCCAGATGG       |
| <b>RUNX1</b>     | Fo     | GCCAGCGGCATGACAACCT        |
|                  | Re     | TAGTGCATGCGGGGGTCCGA       |
| <b>MEIS1</b>     | Fo     | AACCAATCGAAAGCAAGGGGGA     |
|                  | Re     | ATTGGACCACCCGGGCTACAT      |
| <b>MEF2C</b>     | Fo     | AGACCCGGTAATGGGTGGCCA      |
|                  | Re     | ACGCCAATGATATGCCTGCAGGT    |
| <b>MPL</b>       | Fo     | TGGTGACCGCTCTGCATCTA       |
|                  | Re     | GCAGGAACTGCCACCTCA         |
| <b>CXCR4</b>     | Fo     | GCCCTCTGCTGACTATTCC        |
|                  | Re     | GGCAGGATAAGGCCAACCAT       |
| <b>VWF</b>       | Fo     | CAACACCTGCATTTGCCGAA       |
|                  | Re     | TGACCTGTGACAAGGCACTC       |
| <b>SELL</b>      | Fo     | GCGGTGGCTTCTACGATAGG       |
|                  | Re     | CCTAGGTGGCTGTGAGGATTC      |
| <b>PF4</b>       | Fo     | CCGAGTTCCCATCGCACT         |
|                  | Re     | TGGGAGGTGGTCTTCACACA       |
| <b>GP6</b>       | Fo     | CGGTAGCAGAATTCTCAGAAGC     |
|                  | Re     | GTCTGACTCCTTTGGACTGGC      |
| <b>FLK1</b>      | Fo     | TTTTTGCCCTTGTCTGTCC        |
|                  | Re     | TCATTGTTCCAGCATTTCA        |
| <b>NANOG</b>     | Fo     | CATGAGTGTGGATCCAGCTTG      |
|                  | Re     | CCTGAATAAGCAGATCCATGG      |
| <b>OCT4</b>      | Fo     | AGTGAGAGGCAACCTGGAGA       |
|                  | Re     | ACACTCGGACCACATCCTTC       |
| <b>HMBS</b>      | Fo     | GGGAACCAGCTCCCTGCGAAG      |
|                  | Re     | AGCTGTTGCCAGGATGATGGCAC    |
| <b>MDH1</b>      | Fo     | GGGTGTCCTGGACGGTGTCT       |
|                  | Re     | CCCTTCTGGCATGGAGCCAC       |
| <b>GATA1-TG</b>  | Fo     | GGTGGCTCCGCTCAGCTCAT       |
|                  | Re     | GCAGCGTATCCACATAGCGTAAAAGG |
| <b>FLI1-TG</b>   | Fo     | CCCGCCATCCTAACCCACG        |
|                  | Re     | GCAGCGTATCCACATAGCGTAAAAGG |
| <b>TAL1-TG</b>   | Fo     | AGGCGGTGGACTTGAACCTT       |
|                  | Re     | TCTAGCCAGGCACAATCAGC       |
| <b>MEIS1-TG</b>  | Fo     | ATGGGCATGGAGGGGAGTG        |
|                  | Re     | GCAGCGTATCCACATAGCGTAAAAGG |
| <b>MEF2C-TG</b>  | Fo     | CGTACGACGGGAGCGACCGA       |
|                  | Re     | GCAGCGTATCCACATAGCGTAAAAGG |
| <b>NFE2-TG</b>   | Fo     | CCCCGGGGACCAAGATGGA        |
|                  | Re     | GCAGCGTATCCACATAGCGTAAAAGG |
| <b>PBX1-TG</b>   | Fo     | ACAGAAGGCCCTGGCAGTGTT      |
|                  | Re     | GCAGCGTATCCACATAGCGTAAAAGG |
| <b>SPI1-TG</b>   | Fo     | CGCTGCGCAACTACGGCAAGA      |
|                  | Re     | GCAGCGTATCCACATAGCGTAAAAGG |
| <b>ZBTB16-TG</b> | Fo     | CCCGCCGACTGGAGGATAGA       |
|                  | Re     | GCAGCGTATCCACATAGCGTAAAAGG |
